# Supplementary material for: When policy and psychology meet: Mitigating the consequences of bias in schools
Source: PubMed Central journal article supplement (PMC7567593; doi:10.1126/sciadv.aba9479), 2020-10-16
Supplement: aba9479_SM.pdf [file aba9479_SM.pdf]

## Supplementary Materials for

### **When policy and psychology meet: Mitigating the consequences of bias in schools**

Jason A. Okonofua\*, Amanda D. Perez, Sean Darling-Hammond

\*Corresponding author. Email: [okonofua@berkeley.edu](mailto:okonofua@berkeley.edu)

Published 16 October 2020, *Sci. Adv.* **6**, eaba9479 (2020)  
DOI: [10.1126/sciadv.aba9479](https://doi.org/10.1126/sciadv.aba9479)

#### **This PDF file includes:**

Tables S1 to S3

## Supplemental Materials

### Data Availability Statement

All datasets are available at Dryad. Study 1 data: <https://doi.org/10.6078/D1VT4T> ; Study 2a data: <https://doi.org/10.6078/D1R39J>; Study 2b data: <https://doi.org/10.6078/D1MD7N>.

### Code Availability Statement

All coding scripts are available at Dryad. Study 1 script: <https://doi.org/10.6078/D1VT4T> ; Study 2a script: <https://doi.org/10.6078/D1R39J>; Study 2b script: <https://doi.org/10.6078/D1MD7N>.

### Tables and Figures

Table S1. Experiment 1 means and standard deviations of the dependent measures broken down by experimental condition. Scales for all outcomes range 1 = Not at all – 5 = Extremely.

|                              | Feeling Troubled   | Student is a Troublemaker | Student is a Danger | Discipline-severity | Future Strong Relationship Likelihood | Behavior is a Pattern |
|------------------------------|--------------------|---------------------------|---------------------|---------------------|---------------------------------------|-----------------------|
| Perspective and Growth       | M = 2.28 SD = 0.62 | M = 1.80 SD = 0.78        | M = 1.20 SD = 0.40  | M = 1.83 SD = 0.76  | M = 3.63 SD = 0.78                    | M = 3.17 SD = 0.96    |
| Perspective and no Growth    | M = 2.69 SD = 0.90 | M = 2.35 SD = 1.07        | M = 1.58 SD = 0.78  | M = 2.24 SD = 0.95  | M = 3.31 SD = 1.01                    | M = 3.39 SD = 1.06    |
| Growth and no Perspective    | M = 2.51 SD = 0.78 | M = 2.29 SD = 1.06        | M = 1.55 SD = 0.68  | M = 2.09 SD = 0.92  | M = 3.62 SD = 1.04                    | M = 3.32 SD = 1.00    |
| No Growth and no Perspective | M = 2.47 SD = 0.81 | M = 2.22 SD = 1.07        | M = 1.55 SD = 0.73  | M = 2.20 SD = 0.92  | M = 3.32 SD = 1.04                    | M = 3.23 SD = 1.14    |

Table S2. Pilot study means and standard deviations of the dependent measures broken down by experimental condition. Scales for all outcomes range 1 = Not at all – 5 = Extremely.

|                        | Feeling Troubled   | Discipline-severity | Student is a Troublemaker | Behavior is a Pattern | Future Strong Relationship Likelihood | Future Discipline Likelihood | Feeling Personally Responsible |
|------------------------|--------------------|---------------------|---------------------------|-----------------------|---------------------------------------|------------------------------|--------------------------------|
| Teacher Growth         | M = 3.43 SD = 0.96 | M = 3.00 SD = 1.02  | M = 3.05 SD = 1.07        | M = 3.63 SD = 0.94    | M = 2.82 SD = 0.95                    | M = 3.15 SD = 1.09           | M = 2.87 SD = 1.16             |
| Active Teacher Control | M = 3.87 SD = 0.88 | M = 3.53 SD = 1.04  | M = 3.30 SD = 1.02        | M = 3.94 SD = 0.87    | M = 2.40 SD = 1.04                    | M = 3.59 SD = 1.22           | M = 2.55 SD = 1.17             |

Table S3. Experiment 2 means and standard deviations of the dependent measures broken down by experimental condition. Scales for all outcomes range 1 = Not at all – 5 = Extremely.

|                                           | Feeling Troubled   | Discipline-severity | Student is a Troublemaker | Behavior is a Pattern | Future Strong Relationship Likelihood | Future Discipline Likelihood | Feeling Personally Responsible |
|-------------------------------------------|--------------------|---------------------|---------------------------|-----------------------|---------------------------------------|------------------------------|--------------------------------|
| Teacher Growth with Black Student         | M = 2.78 SD = 0.93 | M = 2.42 SD = 0.95  | M = 2.07 SD = 0.93        | M = 3.02 SD = 0.98    | M = 3.39 SD = 0.88                    | M = 2.21 SD = 0.94           | M = 3.10 SD = 1.00             |
| Active Teacher Control with Black Student | M = 3.01 SD = 0.89 | M = 2.71 SD = 0.85  | M = 2.52 SD = 1.00        | M = 3.36 SD = 1.01    | M = 2.85 SD = 0.86                    | M = 2.75 SD = 1.14           | M = 2.89 SD = 1.05             |
| Teacher Growth with White Student         | M = 2.62 SD = 0.99 | M = 2.20 SD = 0.93  | M = 2.10 SD = 1.01        | M = 3.15 SD = 0.93    | M = 3.05 SD = 0.87                    | M = 2.29 SD = 1.05           | M = 2.97 SD = 0.91             |
| Active Teacher Control with White Student | M = 2.64 SD = 0.96 | M = 2.35 SD = 1.02  | M = 2.18 SD = 0.97        | M = 3.05 SD = 1.14    | M = 3.38 SD = 0.91                    | M = 2.47 SD = 1.16           | M = 2.73 SD = 1.12             |

### Study 1

*Exploratory analyses.* In Experiment 1, teachers were asked how dangerous they thought the student would be to other students at the school. A linear regression revealed a significant interaction of the interventions such that – when combined (student-perspective and student-growth) – they led teachers, after the second misbehavior, to be less likely to view the student as a danger ( $b = -0.10$ ,  $se = 0.04$ ,  $t(3, 242) = -2.28$ ,  $p = .02$ ), as compared to any other condition.
